# Supplementary material for: Tidal effect on environmental DNA communities in Arctic estuarine and marine ecosystems
Source: Frontiers journal article supplement (doi:10.3389/fmars.2024.1390489), 2024-06-13
Supplement: Table_7.XLSX [file Table_7.XLSX]

## Sheet: Feuil1
Table S7: Full genera list present in Churchill and Milne Inlet port with the combined gene primers 18S and COI. Churchill and Milne Inlet are characterized by the abbreviation CH and MI respectively.
Taxomy	Ports	Gene Primers
annelida Alitta	CH	COI
annelida Amphichaeta	CH	18S
annelida Amphicorina	MI	18S
annelida Amphitrite	CH+MI	18S+ COI
annelida Aphelochaeta	CH+MI	18S
annelida Apistobranchus	CH	18S
annelida Arcteonais	CH	COI
annelida Arenicola	CH	COI
annelida Aricidea	MI	18S
annelida Aurospio	CH+MI	18S
annelida Bipalponephtys	CH+MI	18S
annelida Bylgides	MI	COI
annelida Capitella	CH	18S
annelida Chaetogaster	CH	COI
annelida Chaetozone	MI	COI
annelida Chitinopoma	CH	18S
annelida Chone	CH	COI
annelida Cirratulus	CH	18S+ COI
annelida Cirrophorus	CH	18S
annelida Clymenura	CH+MI	18S
annelida Echiurus	CH	18S
annelida Enchytraeus	CH	18S+ COI
annelida Enipo	CH+MI	COI
annelida Erinaceusyllis	CH	18S
annelida Erpobdella	CH	18S+ COI
annelida Eteone	CH	COI
annelida Eunoe	CH+MI	COI
annelida Flabelligera	CH+MI	COI
annelida Galathowenia	CH+MI	COI
annelida Gattyana	CH+MI	COI
annelida Glycera	CH	18S+ COI
annelida Harmothoe	CH+MI	COI
annelida Limnodrilus	CH	COI
annelida Lumbricillus	CH	18S+ COI
annelida Lumbrineris	CH	18S
annelida Marenzelleria	MI	COI
annelida Mesenchytraeus	CH	18S
annelida Motobdella	CH	COI
annelida Nais	CH	18S+ COI
annelida Nephtys	CH+MI	18S+ COI
annelida Nereimyra	MI	COI
annelida Nereis	CH+MI	18S+ COI
annelida Nicolea	MI	COI
annelida Nothria	MI	18S+ COI
annelida Ophelia	CH+MI	18S+ COI
annelida Ophelina	MI	18S
annelida Owenia	MI	COI
annelida Paranais	CH	COI
annelida Pectinaria	CH+MI	18S+ COI
annelida Pholoe	CH+MI	COI
annelida Phyllodoce	CH	18S+ COI
annelida Pista	CH+MI	COI
annelida Polycirrus	CH+MI	18S+ COI
annelida Praxillella	CH	COI
annelida Prionospio	CH+MI	COI
annelida Pristina	CH	18S
annelida Pseudoscalibregma	CH	COI
annelida Pygospio	CH	COI
annelida Scalibregma	CH+MI	18S+ COI
annelida Scoletoma	CH	COI
annelida Slavina	CH	COI
annelida Specaria	CH	COI
annelida Spio	CH+MI	COI
annelida Stylaria	CH	18S+ COI
annelida Terebellides	MI	COI
annelida Tubifex	CH	COI
anthozoa Anthostella	CH	18S
anthozoa Halcampoides	CH+MI	18S
arthropoda Acartia	CH+MI	COI
arthropoda Ameronothrus	CH	COI
arthropoda Anonyx	CH	COI
arthropoda Anoplodactylus	CH	COI
arthropoda Argis	MI	COI
arthropoda Aurila	CH+MI	18S
arthropoda Balanus	CH+MI	COI
arthropoda Calanus	MI	COI
arthropoda Candona	CH	18S+ COI
arthropoda Centropages	CH	COI
arthropoda Chydorus	CH	COI
arthropoda Corycaeus	CH	COI
arthropoda Cyclopina	CH+MI	18S
arthropoda Cyclops	MI	18S
arthropoda Cypridopsis	CH	18S+ COI
arthropoda Cypris	CH	COI
arthropoda Cytherissa	CH	COI
arthropoda Cytheromorpha	CH	18S
arthropoda Daphnia	CH	COI
arthropoda Dasyhelea	CH	COI
arthropoda Eualus	MI	COI
arthropoda Eucyclops	CH	18S
arthropoda Eurycercus	CH	COI
arthropoda Eurytemora	CH+MI	18S
arthropoda Gammaracanthus	CH	COI
arthropoda Homarus	CH	COI
arthropoda Hyalella	CH	COI
arthropoda Hyas	CH	COI
arthropoda Hydropsyche	CH	COI
arthropoda Ilyocypris	CH	18S
arthropoda Ischyrocerus	CH	COI
arthropoda Isotomurus	CH	COI
arthropoda Itunella	CH	18S
arthropoda Leptocythere	CH	18S
arthropoda Leptodiaptomus	MI	COI
arthropoda Lithobius	MI	COI
arthropoda Mesochra	CH	18S
arthropoda Neocalanus	MI	18S
arthropoda Neoleptophlebia	CH	COI
arthropoda Nymphon	CH	18S
arthropoda Ochlerotatus	CH	COI
arthropoda Oithona	CH+MI	18S+ COI
arthropoda Onisimus	CH+MI	COI
arthropoda Pseudocalanus	CH	18S+ COI
arthropoda Semicytherura	CH	18S
arthropoda Sida	CH	COI
arthropoda Simocephalus	CH	COI
arthropoda Spirontocaris	MI	COI
arthropoda Thysanoessa	MI	COI
arthropoda Tisbe	CH+MI	COI
arthropoda Vulgarogamasus	CH	COI
bryozoa Alcyonidioides	CH	18S
bryozoa Cauloramphus	CH	COI
bryozoa Hyalinella	CH	COI
calcaronea Leuconia	CH	18S
calcinea Clathrina	CH	18S
chordata Ammodytes	CH+MI	COI
chordata Boltenia	CH+MI	18S+ COI
chordata Boreogadus	MI	COI
chordata Brama	CH	18S
chordata Catostomus	CH	COI
chordata Chelyosoma	CH	18S
chordata Chen	MI	COI
chordata Coregonus	CH	18S+ COI
chordata Cottus	CH	COI
chordata Couesius	CH	COI
chordata Cyclopterus	CH	COI
chordata Delphinapterus	CH	COI
chordata Dendrodoa	CH	18S
chordata Esox	CH	COI
chordata Gadus	CH	COI
chordata Gymnelus	MI	COI
chordata Gymnocanthus	MI	COI
chordata Halocynthia	CH+MI	18S+ COI
chordata Larus	CH	COI
chordata Lateolabrax	CH	18S
chordata Leptagonus	MI	COI
chordata Liparis	CH+MI	COI
chordata Lota	CH	COI
chordata Lumpenus	CH	COI
chordata Lycodes	MI	COI
chordata Mallotus	CH	COI
chordata Monodon	MI	COI
chordata Myoxocephalus	CH+MI	COI
chordata Pelonaia	CH+MI	18S
chordata Pungitius	CH+MI	COI
chordata Pusa	MI	COI
chordata Rana	CH	COI
chordata Rhinichthys	CH	COI
chordata Salvelinus	MI	COI
chordata Styela	CH	18S
chordata Urophycis	CH	COI
cnidaria Aeginopsis	MI	COI
cnidaria Aulactinia	CH+MI	COI
cnidaria Aurelia	CH+MI	COI
cnidaria Bougainvillia	CH+MI	COI
cnidaria Catablema	MI	COI
cnidaria Cyanea	MI	COI
cnidaria Earleria	CH	COI
cnidaria Euphysa	MI	COI
cnidaria Gersemia	CH	COI
cnidaria Gonothyraea	CH+MI	COI
cnidaria Hydra	CH	COI
cnidaria Laodicea	CH+MI	COI
cnidaria Leuckartiara	MI	COI
cnidaria Melicertum	MI	COI
cnidaria Mitrocomella	CH+MI	COI
cnidaria Obelia	CH	COI
cnidaria Sarsia	CH+MI	COI
cyclocoela Lampocteis	MI	18S
dendroceratida Halisarca	CH	18S
echinodermata Crossaster	CH+MI	COI
echinodermata Cucumaria	MI	COI
echinodermata Ekmania	CH	COI
echinodermata Leptasterias	CH	COI
echinodermata Ophiocten	MI	COI
echinodermata Ophiopholis	CH+MI	COI
echinodermata Ophiura	CH+MI	COI
echinodermata Pentamera	MI	COI
echinodermata Psolus	CH+MI	COI
echinodermata Solaster	CH+MI	COI
echinodermata Stephanasterias	MI	COI
echinodermata Strongylocentrotus	CH+MI	COI
echinodermata Thyonidium	MI	COI
entoprocta Barentsia	CH	18S
gastrotricha Chaetonotus	CH	18S
gastrotricha Halichaetonotus	CH	18S
gastrotricha Heterolepidoderma	CH	18S
gastrotricha Macrodasys	CH	18S
hadromerida Halichondria	CH	18S
hadromerida Hymeniacidon	CH+MI	18S
hadromerida Suberites	CH	18S
haplosclerida Ephydatia	CH	18S
haplosclerida Eunapius	CH	18S
haplosclerida Spongilla	CH	18S
hemichordata Saccoglossus	CH+MI	18S
hydrozoa Bonneviella	CH	18S
hydrozoa Bougainvillia	CH	18S
hydrozoa Calycella	CH+MI	18S
hydrozoa Eudendrium	MI	18S
hydrozoa Garveia	CH	18S
hydrozoa Halecium	CH	18S
hydrozoa Hydra	CH	18S
hydrozoa Laomedea	CH	18S
hydrozoa Monobrachium	MI	18S
hydrozoa Neoturris	CH+MI	18S
hydrozoa Opercularella	CH+MI	18S
hydrozoa Orthopyxis	CH	18S
hydrozoa Solmundella	CH+MI	18S
hydrozoa Tiaropsis	CH	18S
micrognathozoa Limnognathia	MI	18S
mollusca Abra	CH+MI	18S
mollusca Aenigmomphiscola	CH	18S
mollusca Chlamys	CH+MI	COI
mollusca Clione	MI	COI
mollusca Corbula	CH	18S
mollusca Dendronotus	MI	COI
mollusca Eubranchus	CH	COI
mollusca Ferrissia	CH	COI
mollusca Flabellina	CH	COI
mollusca Gyraulus	CH	COI
mollusca Hiatella	CH+MI	18S
mollusca Limacina	MI	COI
mollusca Littorina	CH	18S+ COI
mollusca Lymnaea	CH	COI
mollusca Lyogyrus	CH	COI
mollusca Macoma	CH+MI	18S+ COI
mollusca Margarites	MI	18S
mollusca Mopalia	CH+MI	18S
mollusca Musculium	CH	18S
mollusca Mytilus	CH+MI	18S+ COI
mollusca Palliolum	CH+MI	18S
mollusca Physa	CH	COI
mollusca Physella	CH	18S+ COI
mollusca Pisidium	CH	18S+ COI
mollusca Pyganodon	CH	COI
mollusca Sphaerium	CH	18S
mollusca Stagnicola	CH	COI
mollusca Tectura	CH+MI	COI
mollusca Tonicella	CH+MI	18S
nematoda Ascarophis	CH	18S
nematoda Chromadorina	CH	18S
nematoda Chromadorita	CH	18S
nematoda Enoploides	CH	18S
nematoda Plectus	CH	18S
nematoda Rhabdolaimus	CH	18S
nemertea Amphiporus	CH+MI	18S+ COI
nemertea Cephalothrix	CH+MI	18S+ COI
nemertea Cerebratulus	CH	COI
nemertea Lineus	CH	18S
nemertea Tetrastemma	CH	18S
platyhelminthes Astrotorhynchus	CH	18S
platyhelminthes Baicalellia	CH	18S
platyhelminthes Castrada	CH+MI	18S
platyhelminthes Castrella	CH	18S
platyhelminthes Cheliplanilla	CH	18S
platyhelminthes Gieysztoria	CH	18S
platyhelminthes Macrostomum	CH+MI	18S
platyhelminthes Microstomum	CH	18S
platyhelminthes Monocelis	CH	18S
platyhelminthes Olisthanella	CH	18S
platyhelminthes Provortex	CH	18S
platyhelminthes Proxenetes	CH	18S
platyhelminthes Stenostomum	CH	18S
poecilosclerida Iophon	CH	18S
porifera Eunapius	CH	COI
porifera Halichondria	CH+MI	COI
porifera Haliclona	CH+MI	COI
porifera Halisarca	CH	COI
porifera Pseudosuberites	CH	COI
porifera Spongilla	CH	COI
priapulida Priapulus	MI	COI
rotifera Ascomorpha	CH	18S
rotifera Cephalodella	CH+MI	18S
rotifera Encentrum	CH	18S
rotifera Euchlanis	CH	18S
rotifera Keratella	CH	18S+ COI
rotifera Lepadella	CH+MI	18S
rotifera Notommata	CH	18S
rotifera Polyarthra	CH	18S+ COI
rotifera Proales	CH	18S
rotifera Rotaria	CH	COI
rotifera Sinantherina	CH	18S
rotifera Trichotria	CH	18S+ COI
scalidophora Priapulopsis	CH+MI	18S
scyphozoa Aurelia	CH	18S
scyphozoa Cyanea	MI	18S
sipuncula Golfingia	MI	COI
tardigrada Halobiotus	CH	18S
xenacoelomorpha Childia	CH	18S
